# Supplementary material for: State behaviour and dynamics of self-propelled Brownian squares: a simulation study
Source: Royal Society of Chemistry journal article supplement (doi:10.1039/c6sm00347h), 2016-01-01
Supplement: c6sm00347h2.pdf [file c6sm00347h2.pdf]

**State Behaviour and Dynamics of Self-Propelled  
Brownian Squares: A Simulation Study  
Electronic Supplementary Information**

**Supplementary movie**

Movie S1 shows the simulation box for a system of 250000 particles, number density  $\tilde{\rho} = 0.2$  and self-propulsive force  $\tilde{F} = 80$ . For such values of the parameters the system is in the phase coexistence regime. The movie demonstrates the coarsening dynamics of the system.
